# Supplementary material
Source: Research Square preprint supplement (doi:10.21203/rs.3.rs-10214955/v1)
Supplement: Supplementary file 1 [file 8ba686b54332243dfeaf9149.docx]

**Supplementary File**

**Spatio-temporal temperature variability, climate regime shifts and thermal risk in Bankura and Purulia districts of West Bengal, India**

**Table S1. Seasonal Temperature Characteristics, Warming Trends, and Heatwave Occurrence Across Weather Monitoring Stations in the Bankura-Purulia Region (1995-2025).**

| **Station.ID** | **Season** | **Mean_Temp** | **Mean_Max** | **Mean_Min** | **Mean_DTR** | **N_Years** | **Kendall_Tau** | **P_Value** | **Sen_Slope** | **Heatwave_Days** | **Mean_Anomaly** |
| --- | --- | --- | --- | --- | --- | --- | --- | --- | --- | --- | --- |
| Station.1 | Post-Monsoon | 21.89944 | 28.179066 | 15.61981 | 12.55925 | 30 | 0.273563 | 0.035270214 | 0.023007 | 0 | -4.25081 |
| Station.1 | Pre-Monsoon | 28.86597 | 36.072047 | 21.6599 | 14.41215 | 30 | 0.029885 | 0.830475092 | 0.002768 | 427 | 2.715726 |
| Station.1 | Monsoon | 28.39332 | 32.374597 | 24.41204 | 7.962554 | 30 | 0.351724 | 0.006691098 | 0.031148 | 123 | 2.243072 |
| Station.1 | Winter | 18.93415 | 26.170345 | 11.69795 | 14.47239 | 30 | 0.227586 | 0.080391169 | 0.027699 | 0 | -7.2161 |
| Station.10 | Post-Monsoon | 23.34281 | 29.068543 | 17.61709 | 11.45146 | 30 | 0.154023 | 0.238992691 | 0.013263 | 0 | -2.80743 |
| Station.10 | Pre-Monsoon | 29.98316 | 36.640172 | 23.32616 | 13.31402 | 30 | 0.034483 | 0.802761793 | 0.005725 | 457 | 3.832917 |
| Station.10 | Monsoon | 29.40045 | 33.172195 | 25.62871 | 7.543485 | 30 | 0.512644 | 7.47E-05 | 0.033033 | 91 | 3.250205 |
| Station.10 | Winter | 20.61555 | 27.406895 | 13.8242 | 13.58269 | 30 | 0.034483 | 0.802761793 | 0.004102 | 0 | -5.5347 |
| Station.11 | Post-Monsoon | 23.34281 | 29.068543 | 17.61709 | 11.45146 | 30 | 0.154023 | 0.238992691 | 0.013263 | 0 | -2.80743 |
| Station.11 | Pre-Monsoon | 29.98316 | 36.640172 | 23.32616 | 13.31402 | 30 | 0.034483 | 0.802761793 | 0.005725 | 457 | 3.832917 |
| Station.11 | Monsoon | 29.40045 | 33.172195 | 25.62871 | 7.543485 | 30 | 0.512644 | 7.47E-05 | 0.033033 | 91 | 3.250205 |
| Station.11 | Winter | 20.61555 | 27.406895 | 13.8242 | 13.58269 | 30 | 0.034483 | 0.802761793 | 0.004102 | 0 | -5.5347 |
| Station.12 | Post-Monsoon | 23.40492 | 29.289944 | 17.51989 | 11.77005 | 30 | 0.135632 | 0.300771713 | 0.013935 | 0 | -2.74533 |
| Station.12 | Pre-Monsoon | 29.28464 | 36.031779 | 22.5375 | 13.49427 | 30 | 0.057471 | 0.668516636 | 0.005951 | 443 | 3.134394 |
| Station.12 | Monsoon | 29.44838 | 33.549867 | 25.3469 | 8.202966 | 30 | 0.503448 | 0.000100493 | 0.037459 | 107 | 3.298137 |
| Station.12 | Winter | 19.69189 | 26.641715 | 12.74207 | 13.89965 | 30 | 0.011494 | 0.943107963 | 0.001256 | 0 | -6.45836 |
| Station.13 | Post-Monsoon | 23.40492 | 29.289944 | 17.51989 | 11.77005 | 30 | 0.135632 | 0.300771713 | 0.013935 | 0 | -2.74533 |
| Station.13 | Pre-Monsoon | 29.28464 | 36.031779 | 22.5375 | 13.49427 | 30 | 0.057471 | 0.668516636 | 0.005951 | 443 | 3.134394 |
| Station.13 | Monsoon | 29.44838 | 33.549867 | 25.3469 | 8.202966 | 30 | 0.503448 | 0.000100493 | 0.037459 | 107 | 3.298137 |
| Station.13 | Winter | 19.69189 | 26.641715 | 12.74207 | 13.89965 | 30 | 0.011494 | 0.943107963 | 0.001256 | 0 | -6.45836 |
| Station.14 | Post-Monsoon | 24.15057 | 29.224807 | 19.07633 | 10.14848 | 30 | 0.186207 | 0.15349853 | 0.014657 | 0 | -1.99968 |
| Station.14 | Pre-Monsoon | 29.57908 | 34.803523 | 24.35463 | 10.44889 | 30 | 0.043678 | 0.748105407 | 0.004598 | 420 | 3.428829 |
| Station.14 | Monsoon | 29.69039 | 32.956759 | 26.42402 | 6.532737 | 30 | 0.48046 | 0.00020647 | 0.032615 | 128 | 3.540143 |
| Station.14 | Winter | 21.00103 | 26.968807 | 15.03326 | 11.93554 | 30 | 0.016092 | 0.914752364 | 0.001912 | 0 | -5.14921 |
| Station.2 | Post-Monsoon | 21.89944 | 28.179066 | 15.61981 | 12.55925 | 30 | 0.273563 | 0.035270214 | 0.023007 | 0 | -4.25081 |
| Station.2 | Pre-Monsoon | 28.86597 | 36.072047 | 21.6599 | 14.41215 | 30 | 0.029885 | 0.830475092 | 0.002768 | 427 | 2.715726 |
| Station.2 | Monsoon | 28.39332 | 32.374597 | 24.41204 | 7.962554 | 30 | 0.351724 | 0.006691098 | 0.031148 | 123 | 2.243072 |
| Station.2 | Winter | 18.93415 | 26.170345 | 11.69795 | 14.47239 | 30 | 0.227586 | 0.080391169 | 0.027699 | 0 | -7.2161 |
| Station.3 | Post-Monsoon | 22.24267 | 28.458037 | 16.02731 | 12.43073 | 30 | 0.347126 | 0.007447243 | 0.034488 | 0 | -3.90757 |
| Station.3 | Pre-Monsoon | 29.28265 | 36.471556 | 22.09374 | 14.37782 | 30 | 0.089655 | 0.497797489 | 0.012268 | 445 | 3.132399 |
| Station.3 | Monsoon | 28.28261 | 32.183454 | 24.38177 | 7.801688 | 30 | 0.356322 | 0.00600481 | 0.030149 | 104 | 2.132363 |
| Station.3 | Winter | 19.75494 | 27.09369 | 12.41619 | 14.6775 | 30 | 0.181609 | 0.164043427 | 0.028788 | 0 | -6.39531 |
| Station.4 | Post-Monsoon | 22.72401 | 28.738394 | 16.70963 | 12.02877 | 30 | 0.167816 | 0.198948145 | 0.014755 | 0 | -3.42624 |
| Station.4 | Pre-Monsoon | 29.30859 | 36.287563 | 22.32961 | 13.95795 | 30 | 0.043678 | 0.748105407 | 0.003357 | 442 | 3.158341 |
| Station.4 | Monsoon | 29.10743 | 33.141512 | 25.07335 | 8.068162 | 30 | 0.425287 | 0.001027942 | 0.036551 | 106 | 2.957184 |
| Station.4 | Winter | 19.46765 | 26.482578 | 12.45272 | 14.02986 | 30 | 0.085057 | 0.520693302 | 0.014499 | 0 | -6.6826 |
| Station.5 | Post-Monsoon | 22.72401 | 28.738394 | 16.70963 | 12.02877 | 30 | 0.167816 | 0.198948145 | 0.014755 | 0 | -3.42624 |
| Station.5 | Pre-Monsoon | 29.30859 | 36.287563 | 22.32961 | 13.95795 | 30 | 0.043678 | 0.748105407 | 0.003357 | 442 | 3.158341 |
| Station.5 | Monsoon | 29.10743 | 33.141512 | 25.07335 | 8.068162 | 30 | 0.425287 | 0.001027942 | 0.036551 | 106 | 2.957184 |
| Station.5 | Winter | 19.46765 | 26.482578 | 12.45272 | 14.02986 | 30 | 0.085057 | 0.520693302 | 0.014499 | 0 | -6.6826 |
| Station.6 | Post-Monsoon | 23.34281 | 29.068543 | 17.61709 | 11.45146 | 30 | 0.154023 | 0.238992691 | 0.013263 | 0 | -2.80743 |
| Station.6 | Pre-Monsoon | 29.98316 | 36.640172 | 23.32616 | 13.31402 | 30 | 0.034483 | 0.802761793 | 0.005725 | 457 | 3.832917 |
| Station.6 | Monsoon | 29.40045 | 33.172195 | 25.62871 | 7.543485 | 30 | 0.512644 | 7.47E-05 | 0.033033 | 91 | 3.250205 |
| Station.6 | Winter | 20.61555 | 27.406895 | 13.8242 | 13.58269 | 30 | 0.034483 | 0.802761793 | 0.004102 | 0 | -5.5347 |
| Station.7 | Post-Monsoon | 23.34281 | 29.068543 | 17.61709 | 11.45146 | 30 | 0.154023 | 0.238992691 | 0.013263 | 0 | -2.80743 |
| Station.7 | Pre-Monsoon | 29.98316 | 36.640172 | 23.32616 | 13.31402 | 30 | 0.034483 | 0.802761793 | 0.005725 | 457 | 3.832917 |
| Station.7 | Monsoon | 29.40045 | 33.172195 | 25.62871 | 7.543485 | 30 | 0.512644 | 7.47E-05 | 0.033033 | 91 | 3.250205 |
| Station.7 | Winter | 20.61555 | 27.406895 | 13.8242 | 13.58269 | 30 | 0.034483 | 0.802761793 | 0.004102 | 0 | -5.5347 |
| Station.8 | Post-Monsoon | 22.72401 | 28.738394 | 16.70963 | 12.02877 | 30 | 0.167816 | 0.198948145 | 0.014755 | 0 | -3.42624 |
| Station.8 | Pre-Monsoon | 29.30859 | 36.287563 | 22.32961 | 13.95795 | 30 | 0.043678 | 0.748105407 | 0.003357 | 442 | 3.158341 |
| Station.8 | Monsoon | 29.10743 | 33.141512 | 25.07335 | 8.068162 | 30 | 0.425287 | 0.001027942 | 0.036551 | 106 | 2.957184 |
| Station.8 | Winter | 19.46765 | 26.482578 | 12.45272 | 14.02986 | 30 | 0.085057 | 0.520693302 | 0.014499 | 0 | -6.6826 |
| Station.9 | Post-Monsoon | 22.72401 | 28.738394 | 16.70963 | 12.02877 | 30 | 0.167816 | 0.198948145 | 0.014755 | 0 | -3.42624 |
| Station.9 | Pre-Monsoon | 29.30859 | 36.287563 | 22.32961 | 13.95795 | 30 | 0.043678 | 0.748105407 | 0.003357 | 442 | 3.158341 |
| Station.9 | Monsoon | 29.10743 | 33.141512 | 25.07335 | 8.068162 | 30 | 0.425287 | 0.001027942 | 0.036551 | 106 | 2.957184 |
| Station.9 | Winter | 19.46765 | 26.482578 | 12.45272 | 14.02986 | 30 | 0.085057 | 0.520693302 | 0.014499 | 0 | -6.6826 |

**Note:** Mean_Temp = mean seasonal temperature; Mean_Max = mean seasonal maximum temperature; Mean_Min = mean seasonal minimum temperature; Mean_DTR = mean diurnal temperature range; Kendall’s Tau indicates the direction and strength of monotonic trends; Sen’s Slope represents the seasonal rate of temperature change (°C year⁻¹); Heatwave_Days denotes the cumulative number of heatwave days during 1995–2025; Mean_Anomaly represents the average seasonal temperature anomaly (°C). Trends are considered statistically significant at p < 0.05.

**Table S2. Integrated Climate Risk Assessment Across Stations.**

| **Station ID** | **Normalized Sen’s Slope** | **Heatwave Frequency** | **Climate Risk Index** | **Risk Category** |
| --- | --- | --- | --- | --- |
| 1 | 0.858 | 0 | 0.302 | Low |
| 2 | 0.858 | 0 | 0.302 | Low |
| 3 | 1 | 0 | 0.374 | Moderate |
| 4 | 0.482 | 0 | 0.385 | Moderate |
| 5 | 0.482 | 0 | 0.385 | Moderate |
| 6 | 0 | 0.571 | 0.669 | High |
| 7 | 0 | 0.571 | 0.669 | High |
| 8 | 0.482 | 0 | 0.385 | Moderate |
| 9 | 0.482 | 0 | 0.385 | Moderate |
| 10 | 0 | 0.571 | 0.669 | High |
| 11 | 0 | 0.571 | 0.669 | High |
| 12 | 0.144 | 0 | 0.469 | Moderate |
| 13 | 0.144 | 0 | 0.469 | Moderate |
| 14 | 0.049 | 1 | 0.546 | Moderate |

**Note:** The Climate Risk Index (CRI) was derived by integrating normalized Sen's slope and heatwave frequency. Higher CRI values indicate greater thermal vulnerability. Risk categories were classified as Low, Moderate, and High based on the integrated CRI scores.

**Table S3. Projected Temperature Trajectories and 95% Prediction Intervals Derived from ARIMA Models (2026-2035).**

| **Station.ID** | **Year** | **Forecast_Temp** | **Lower_95** | **Upper_95** |
| --- | --- | --- | --- | --- |
| Station.1 | 2026 | 25.851582 | 25.03055548 | 26.67261 |
| Station.1 | 2027 | 25.851582 | 24.69047537 | 27.01269 |
| Station.1 | 2028 | 25.851582 | 24.42952272 | 27.27364 |
| Station.1 | 2029 | 25.851582 | 24.20952946 | 27.49363 |
| Station.1 | 2030 | 25.851582 | 24.01571151 | 27.68745 |
| Station.1 | 2031 | 25.851582 | 23.84048668 | 27.86268 |
| Station.1 | 2032 | 25.851582 | 23.67935083 | 28.02381 |
| Station.1 | 2033 | 25.851582 | 23.52936923 | 28.17379 |
| Station.1 | 2034 | 25.851582 | 23.38850344 | 28.31466 |
| Station.1 | 2035 | 25.851582 | 23.25526926 | 28.44789 |
| Station.10 | 2026 | 26.589144 | 25.99030856 | 27.18798 |
| Station.10 | 2027 | 26.589144 | 25.99030856 | 27.18798 |
| Station.10 | 2028 | 26.589144 | 25.99030856 | 27.18798 |
| Station.10 | 2029 | 26.589144 | 25.99030856 | 27.18798 |
| Station.10 | 2030 | 26.589144 | 25.99030856 | 27.18798 |
| Station.10 | 2031 | 26.589144 | 25.99030856 | 27.18798 |
| Station.10 | 2032 | 26.589144 | 25.99030856 | 27.18798 |
| Station.10 | 2033 | 26.589144 | 25.99030856 | 27.18798 |
| Station.10 | 2034 | 26.589144 | 25.99030856 | 27.18798 |
| Station.10 | 2035 | 26.589144 | 25.99030856 | 27.18798 |
| Station.11 | 2026 | 26.589144 | 25.99030856 | 27.18798 |
| Station.11 | 2027 | 26.589144 | 25.99030856 | 27.18798 |
| Station.11 | 2028 | 26.589144 | 25.99030856 | 27.18798 |
| Station.11 | 2029 | 26.589144 | 25.99030856 | 27.18798 |
| Station.11 | 2030 | 26.589144 | 25.99030856 | 27.18798 |
| Station.11 | 2031 | 26.589144 | 25.99030856 | 27.18798 |
| Station.11 | 2032 | 26.589144 | 25.99030856 | 27.18798 |
| Station.11 | 2033 | 26.589144 | 25.99030856 | 27.18798 |
| Station.11 | 2034 | 26.589144 | 25.99030856 | 27.18798 |
| Station.11 | 2035 | 26.589144 | 25.99030856 | 27.18798 |
| Station.12 | 2026 | 26.263318 | 25.68185518 | 26.84478 |
| Station.12 | 2027 | 26.301985 | 25.67945178 | 26.92452 |
| Station.12 | 2028 | 26.301985 | 25.67945178 | 26.92452 |
| Station.12 | 2029 | 26.301985 | 25.67945178 | 26.92452 |
| Station.12 | 2030 | 26.301985 | 25.67945178 | 26.92452 |
| Station.12 | 2031 | 26.301985 | 25.67945178 | 26.92452 |
| Station.12 | 2032 | 26.301985 | 25.67945178 | 26.92452 |
| Station.12 | 2033 | 26.301985 | 25.67945178 | 26.92452 |
| Station.12 | 2034 | 26.301985 | 25.67945178 | 26.92452 |
| Station.12 | 2035 | 26.301985 | 25.67945178 | 26.92452 |
| Station.13 | 2026 | 26.263318 | 25.68185518 | 26.84478 |
| Station.13 | 2027 | 26.301985 | 25.67945178 | 26.92452 |
| Station.13 | 2028 | 26.301985 | 25.67945178 | 26.92452 |
| Station.13 | 2029 | 26.301985 | 25.67945178 | 26.92452 |
| Station.13 | 2030 | 26.301985 | 25.67945178 | 26.92452 |
| Station.13 | 2031 | 26.301985 | 25.67945178 | 26.92452 |
| Station.13 | 2032 | 26.301985 | 25.67945178 | 26.92452 |
| Station.13 | 2033 | 26.301985 | 25.67945178 | 26.92452 |
| Station.13 | 2034 | 26.301985 | 25.67945178 | 26.92452 |
| Station.13 | 2035 | 26.301985 | 25.67945178 | 26.92452 |
| Station.14 | 2026 | 26.753114 | 26.18587493 | 27.32035 |
| Station.14 | 2027 | 26.843767 | 26.24835682 | 27.43918 |
| Station.14 | 2028 | 26.843767 | 26.24835682 | 27.43918 |
| Station.14 | 2029 | 26.843767 | 26.24835682 | 27.43918 |
| Station.14 | 2030 | 26.843767 | 26.24835682 | 27.43918 |
| Station.14 | 2031 | 26.843767 | 26.24835682 | 27.43918 |
| Station.14 | 2032 | 26.843767 | 26.24835682 | 27.43918 |
| Station.14 | 2033 | 26.843767 | 26.24835682 | 27.43918 |
| Station.14 | 2034 | 26.843767 | 26.24835682 | 27.43918 |
| Station.14 | 2035 | 26.843767 | 26.24835682 | 27.43918 |
| Station.2 | 2026 | 25.851582 | 25.03055548 | 26.67261 |
| Station.2 | 2027 | 25.851582 | 24.69047537 | 27.01269 |
| Station.2 | 2028 | 25.851582 | 24.42952272 | 27.27364 |
| Station.2 | 2029 | 25.851582 | 24.20952946 | 27.49363 |
| Station.2 | 2030 | 25.851582 | 24.01571151 | 27.68745 |
| Station.2 | 2031 | 25.851582 | 23.84048668 | 27.86268 |
| Station.2 | 2032 | 25.851582 | 23.67935083 | 28.02381 |
| Station.2 | 2033 | 25.851582 | 23.52936923 | 28.17379 |
| Station.2 | 2034 | 25.851582 | 23.38850344 | 28.31466 |
| Station.2 | 2035 | 25.851582 | 23.25526926 | 28.44789 |
| Station.3 | 2026 | 25.936881 | 25.09600563 | 26.77776 |
| Station.3 | 2027 | 25.936881 | 24.74770361 | 27.12606 |
| Station.3 | 2028 | 25.936881 | 24.48044206 | 27.39332 |
| Station.3 | 2029 | 25.936881 | 24.25513016 | 27.61863 |
| Station.3 | 2030 | 25.936881 | 24.05662639 | 27.81714 |
| Station.3 | 2031 | 25.936881 | 23.87716527 | 27.9966 |
| Station.3 | 2032 | 25.936881 | 23.71213373 | 28.16163 |
| Station.3 | 2033 | 25.936881 | 23.55852612 | 28.31524 |
| Station.3 | 2034 | 25.936881 | 23.4142547 | 28.45951 |
| Station.3 | 2035 | 25.936881 | 23.27779939 | 28.59596 |
| Station.4 | 2026 | 26.227999 | 25.46939161 | 26.98661 |
| Station.4 | 2027 | 26.227999 | 25.15516613 | 27.30083 |
| Station.4 | 2028 | 26.227999 | 24.91405243 | 27.54195 |
| Station.4 | 2029 | 26.227999 | 24.71078419 | 27.74521 |
| Station.4 | 2030 | 26.227999 | 24.53170126 | 27.9243 |
| Station.4 | 2031 | 26.227999 | 24.36979793 | 28.0862 |
| Station.4 | 2032 | 26.227999 | 24.22091245 | 28.23509 |
| Station.4 | 2033 | 26.227999 | 24.08233322 | 28.37366 |
| Station.4 | 2034 | 26.227999 | 23.95217676 | 28.50382 |
| Station.4 | 2035 | 26.227999 | 23.82907172 | 28.62693 |
| Station.5 | 2026 | 26.227999 | 25.46939161 | 26.98661 |
| Station.5 | 2027 | 26.227999 | 25.15516613 | 27.30083 |
| Station.5 | 2028 | 26.227999 | 24.91405243 | 27.54195 |
| Station.5 | 2029 | 26.227999 | 24.71078419 | 27.74521 |
| Station.5 | 2030 | 26.227999 | 24.53170126 | 27.9243 |
| Station.5 | 2031 | 26.227999 | 24.36979793 | 28.0862 |
| Station.5 | 2032 | 26.227999 | 24.22091245 | 28.23509 |
| Station.5 | 2033 | 26.227999 | 24.08233322 | 28.37366 |
| Station.5 | 2034 | 26.227999 | 23.95217676 | 28.50382 |
| Station.5 | 2035 | 26.227999 | 23.82907172 | 28.62693 |
| Station.6 | 2026 | 26.589144 | 25.99030856 | 27.18798 |
| Station.6 | 2027 | 26.589144 | 25.99030856 | 27.18798 |
| Station.6 | 2028 | 26.589144 | 25.99030856 | 27.18798 |
| Station.6 | 2029 | 26.589144 | 25.99030856 | 27.18798 |
| Station.6 | 2030 | 26.589144 | 25.99030856 | 27.18798 |
| Station.6 | 2031 | 26.589144 | 25.99030856 | 27.18798 |
| Station.6 | 2032 | 26.589144 | 25.99030856 | 27.18798 |
| Station.6 | 2033 | 26.589144 | 25.99030856 | 27.18798 |
| Station.6 | 2034 | 26.589144 | 25.99030856 | 27.18798 |
| Station.6 | 2035 | 26.589144 | 25.99030856 | 27.18798 |
| Station.7 | 2026 | 26.589144 | 25.99030856 | 27.18798 |
| Station.7 | 2027 | 26.589144 | 25.99030856 | 27.18798 |
| Station.7 | 2028 | 26.589144 | 25.99030856 | 27.18798 |
| Station.7 | 2029 | 26.589144 | 25.99030856 | 27.18798 |
| Station.7 | 2030 | 26.589144 | 25.99030856 | 27.18798 |
| Station.7 | 2031 | 26.589144 | 25.99030856 | 27.18798 |
| Station.7 | 2032 | 26.589144 | 25.99030856 | 27.18798 |
| Station.7 | 2033 | 26.589144 | 25.99030856 | 27.18798 |
| Station.7 | 2034 | 26.589144 | 25.99030856 | 27.18798 |
| Station.7 | 2035 | 26.589144 | 25.99030856 | 27.18798 |
| Station.8 | 2026 | 26.227999 | 25.46939161 | 26.98661 |
| Station.8 | 2027 | 26.227999 | 25.15516613 | 27.30083 |
| Station.8 | 2028 | 26.227999 | 24.91405243 | 27.54195 |
| Station.8 | 2029 | 26.227999 | 24.71078419 | 27.74521 |
| Station.8 | 2030 | 26.227999 | 24.53170126 | 27.9243 |
| Station.8 | 2031 | 26.227999 | 24.36979793 | 28.0862 |
| Station.8 | 2032 | 26.227999 | 24.22091245 | 28.23509 |
| Station.8 | 2033 | 26.227999 | 24.08233322 | 28.37366 |
| Station.8 | 2034 | 26.227999 | 23.95217676 | 28.50382 |
| Station.8 | 2035 | 26.227999 | 23.82907172 | 28.62693 |
| Station.9 | 2026 | 26.227999 | 25.46939161 | 26.98661 |
| Station.9 | 2027 | 26.227999 | 25.15516613 | 27.30083 |
| Station.9 | 2028 | 26.227999 | 24.91405243 | 27.54195 |
| Station.9 | 2029 | 26.227999 | 24.71078419 | 27.74521 |
| Station.9 | 2030 | 26.227999 | 24.53170126 | 27.9243 |
| Station.9 | 2031 | 26.227999 | 24.36979793 | 28.0862 |
| Station.9 | 2032 | 26.227999 | 24.22091245 | 28.23509 |
| Station.9 | 2033 | 26.227999 | 24.08233322 | 28.37366 |
| Station.9 | 2034 | 26.227999 | 23.95217676 | 28.50382 |
| Station.9 | 2035 | 26.227999 | 23.82907172 | 28.62693 |
| **Note:** The optimal forecasting model was ARIMA(0,1,0) (AIC = 27.30; AICc = 27.45; BIC = 28.71). Model accuracy was satisfactory (RMSE = 0.363°C; MAE = 0.298°C; MAPE = 1.141%), while the Ljung–Box test (p = 0.656) indicated no significant residual autocorrelation. Forecasts were produced for the period 2026–2035. | | | | |
